# Supplementary material for: Electrochemical assessment of a tripodal thiourea-based anion receptor at the liquid|liquid interface
Source: Royal Society of Chemistry journal article supplement (doi:10.1039/d3cp01431b), 2023-01-01
Supplement: d3cp01431b1.pdf [file d3cp01431b1.pdf]

Supporting Information

for

**Electrochemical Assessment of a Tripodal Thiourea-Based Anion  
Receptor at the Liquid | Liquid Interface**

*Hussain A. Al Nasser<sup>[a],[b]</sup>, Luis Martinez-Crespo<sup>[a],[c],1</sup>, Simon J. Webb<sup>[a]</sup>, and Robert A. W.  
Dryfe<sup>[a],[b]\*</sup>*

<sup>[a]</sup> Department of Chemistry, <sup>[b]</sup> Henry Royce Institute for Advanced Materials, <sup>[c]</sup> Manchester Institute  
of Biotechnology

The University of Manchester, Oxford Road, Manchester, M13 9PL

U.K.

E-mail: [robert.dryfe@manchester.ac.uk](mailto:robert.dryfe@manchester.ac.uk)\*

1 = Present address = Department of Chemistry, Universitat de les Illes Balears, Palma, 07122, Spain.

## 1. Preparation of receptor **1**.

Receptor **1** was prepared by a method previously reported<sup>1</sup>, with a modified purification process. A solution of tris(2-aminoethyl)amine (200 mg, 1.37 mmol) and *n*-pentylisothiocyanate (613 mg, 4.51 mmol) in dichloromethane (DCM) (10 mL) was stirred for 72 h. The solvent was evaporated, resulting in a light yellow oil. The residue was purified by column chromatography (SiO<sub>2</sub>, DCM-AcOEt 1:1), precipitated from DCM-hexane, and dried under vacuum to afford the product as a white solid. Yield: 607 mg (83%). The <sup>1</sup>H NMR data coincided with those previously reported. <sup>1</sup>H NMR (400 MHz, DMSO-*d*<sub>6</sub>): δ = 7.48 (s, 3H), 7.18 (s, 3H), 3.45 (s, 6H), 2.62 (t, *J* = 6.6 Hz, 6H), 1.56 – 1.38 (m, 6H), 1.36 – 1.14 (m, 12H), 0.87 (t, *J* = 6.9 Hz, 9H).

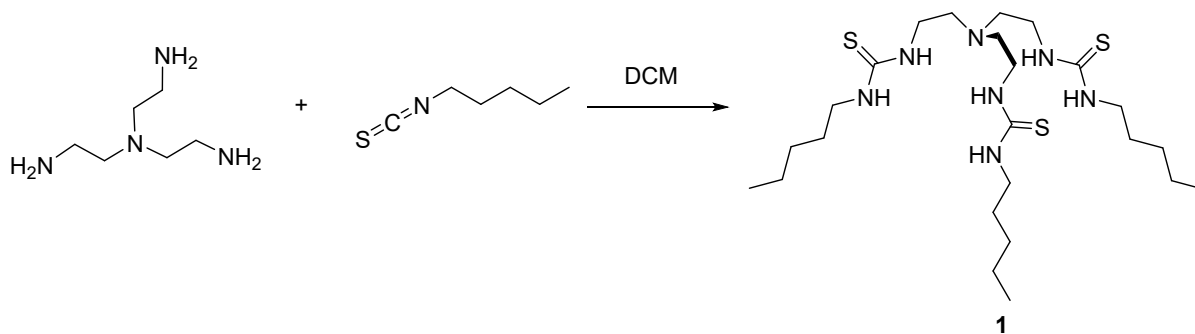

2. Facilitated  $\text{Cl}^-$  transfer limited by concentration of receptor **1**.

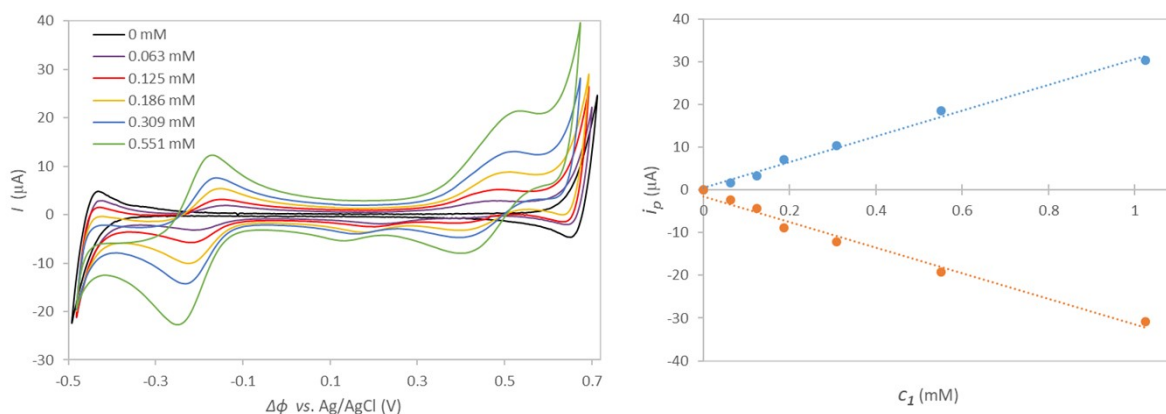

Figure S1. **Left**) CVs of Cell 1 in the presence of the electrolytes 20mM  $\text{NaCl}_{(\text{aq})}$  | 10mM  $\text{BTTPATFPB}_{(\text{DCB})}$  and various concentrations of receptor **1**<sub>(DCB)</sub>. CVs were calibrated in accordance with the formal transfer potential of  $\text{TMA}^+$  at the water | DCB interface. **Right**) Plot of the peak current of  $\text{Cl}^-$ —**1** complex ( $i_p$ ) as a function of the concentration of receptor **1** ( $c_1$ ). Scan rate = 10 mV/s.

### 3. Diffusion coefficient ( $D$ ) calculation.

The diffusion coefficient of receptor **1** can be estimated from the Randles-Ševčík equation,

$$i_p = 0.4463 \left( \frac{z^3 F^3}{RT} \right)^{1/2} A.C (D.v)^{1/2} \quad \text{Equation S1}$$

Where  $i_p$  is the peak current of the facilitated anion transfer,  $v$  is the scan rate of the voltammetric measurements,  $A$  is area of the aqueous | organic interface,  $C$  concentration of the ionophore,  $D$  is the diffusion coefficient of the ionophore in the organic interface,  $F$  is the Faraday constant,  $z$  is the charge

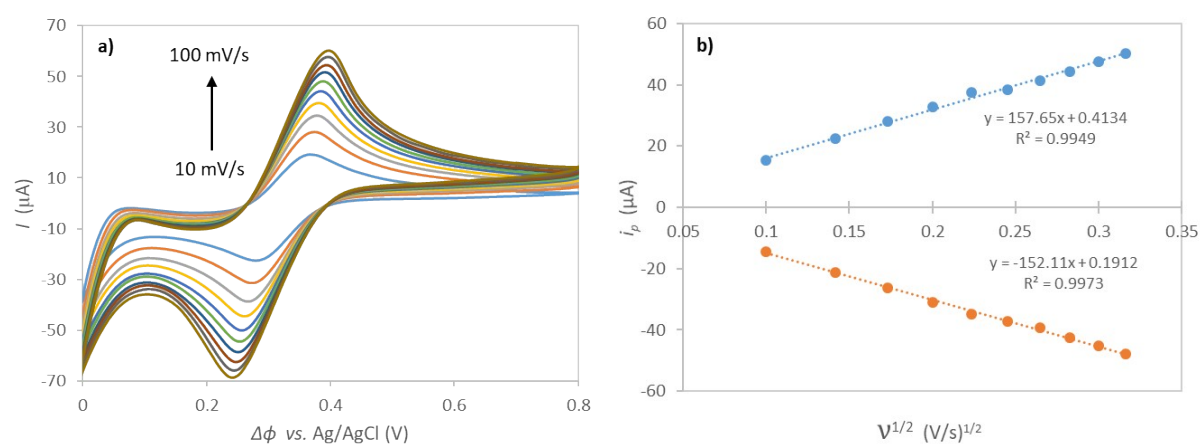

of the ion,  $T$  is the temperature in Kelvin and  $R$  is the universal gas constant.

**Figure S2. a)** CVs of Cell 1 in the presence of the electrolytes 20mM NaCl<sub>(aq)</sub> | 10mM BTTPATFPB<sub>(DCB)</sub> and 1mM receptor **1**<sub>(DCB)</sub> showing the facilitated Cl<sup>-</sup> transfer peak. **b)** Plot of Randles-Ševčík equation of the peak current ( $i_p$ ) as a function of the square root of the scan rate ( $v^{1/2}$ ) for the forward and reverse peaks. Scan rates were from 10-100 mV/s (increments of 10 mV/s).

#### 4. Stoichiometry and association constant ( $K_a$ ).

For the stoichiometry and association constant determination, Equation 1 in the main text was used.

These calculations require  $\Delta_o^w \phi_{A^-}^{\circ}$  of the anion at the studied aqueous|organic interface (see section 4 below), and  $\Delta_o^w \phi^{1/2}$  of the anion of the calibrated CV.

Calibration of the CVs is a mandatory practice for the analysis calculations, since the absolute scale of the Galvani potential difference is not accessible by direct measurements. In this context, a calibrator ion of known and defined standard transfer potential can be used to scale the CV data. Herein, the

CVs were calibrated by adding tetramethylammonium cation (0.2mM TMA<sup>+</sup>,  $\Delta_o^w \phi_{TMA^+}^{\circ} = 0.226 V$ )<sup>2</sup> during the voltammetric measurements. Calibrated CVs for the facilitated Cl<sup>-</sup> and Br<sup>-</sup> transfer in

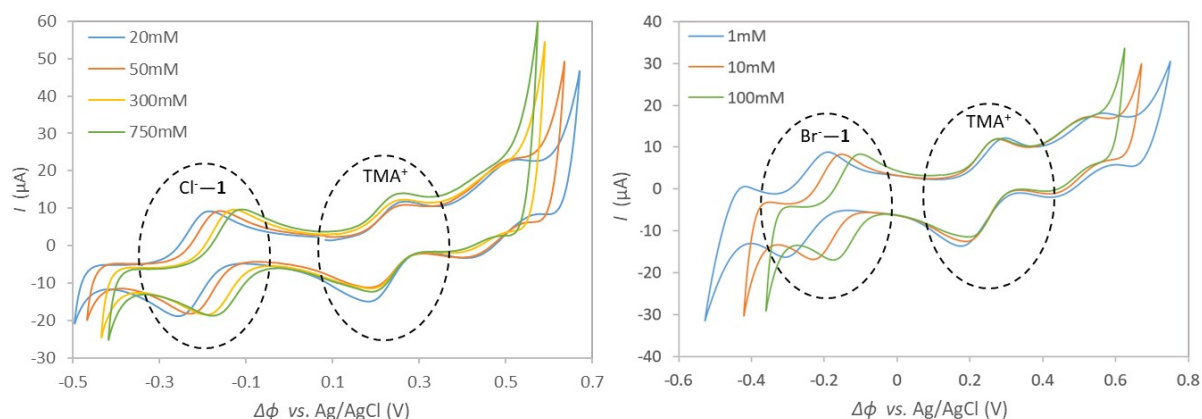

presence of TMA<sup>+</sup> are shown in Figure S3.

**Figure S3.** CVs of Cell 1 for NaCl<sub>(aq)</sub> (**Left**) and NaBr<sub>(aq)</sub> (**Right**) at various concentrations in the presence of 0.5mM receptor **1**<sub>(DCB)</sub> and the calibrator cation 0.2mM TMA<sup>+</sup><sub>(aq)</sub>. Scan rate = 10 mV/s.

Differential pulse voltammetry (DPV) was also employed to extract accurate half-wave potential data, especially in case of overlapping of the transfer wave of TMA<sup>+</sup> with other peaks. An example which involves the facilitated transfer of CH<sub>3</sub>COO<sup>-</sup> is shown in Figure S4.

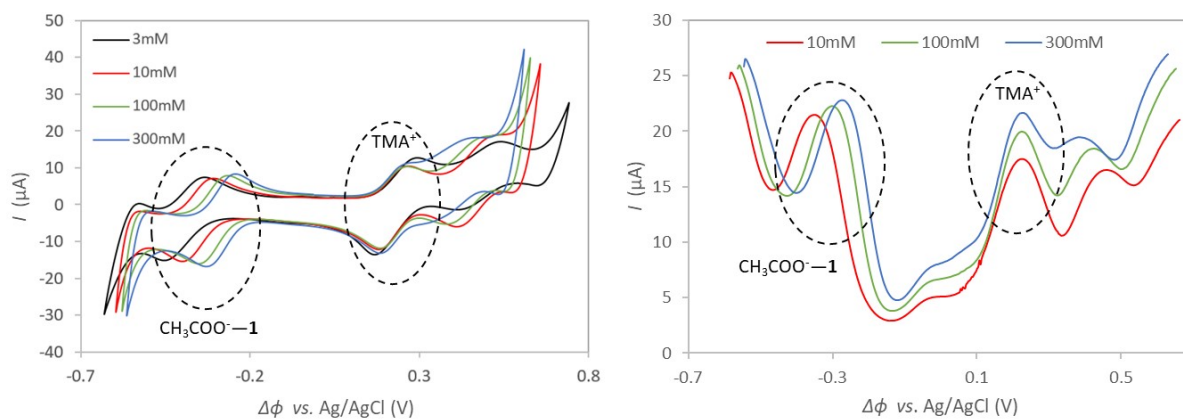

**Figure S4. (Left)** CVs of Cell 1 for  $\text{CH}_3\text{COOLi}_{(\text{aq})}$  at various concentrations in the presence of 0.5mM receptor  $\mathbf{1}_{(\text{DCB})}$  and the calibrator cation 0.2mM  $\text{TMA}^+_{(\text{aq})}$ . Scan rate = 10 mV/s. **(Right)** DPV curve of the cell at various concentrations. Scan rate = 50 mV/s.

5. Correlations of the standard Gibbs energy of ion transfer ( $\Delta G_{tr}^{\ominus, w \rightarrow o}$ ).

Due to the lack of the data of the standard anion transfer potential ( $\Delta_o^w \phi_{A^-}^{\ominus}$ ) from water to DCB for Br<sup>-</sup>, CH<sub>3</sub>COO<sup>-</sup> and SO<sub>4</sub><sup>2-</sup>,  $\Delta_o^w \phi_{A^-}^{\ominus}$  data from other solvents were used to estimate the required data in DCB. That is, plots of the standard Gibbs energy of ion transfer ( $\Delta G_{tr}^{\ominus, w \rightarrow o}$ ) from water to different solvents were found to provide linear correlations, allowing to estimate  $\Delta G_{tr}^{\ominus, w \rightarrow o}$  of unknown data in one solvent relative to a known one of another solvent<sup>3,4</sup>.  $\Delta G_{tr}^{\ominus, w \rightarrow o}$  data are more widely reported for 1,2-dichloroethane (DCE) and nitrobenzene (NB) solvents, unlike DCB. Thus,  $\Delta G_{tr}^{\ominus, w \rightarrow NB}$  and  $\Delta G_{tr}^{\ominus, w \rightarrow DCE}$  data were plotted in relation to  $\Delta G_{tr}^{\ominus, w \rightarrow DCB}$  of some reported data (Fig. S5). The average  $\Delta G_{tr}^{\ominus, w \rightarrow DCB}$  values for transfer from water to DCB for Cl<sup>-</sup>, Br<sup>-</sup>, CH<sub>3</sub>COO<sup>-</sup> and SO<sub>4</sub><sup>2-</sup> were estimated to equal 63.05, 51.01, 53.47 and 139.41 kJ/mol, respectively. Subsequently,  $\Delta_o^w \phi_{A^-}^{\ominus}$  values were calculated from,

$$\Delta_o^w \phi_{A^-}^{\ominus} = \frac{\Delta G_{tr}^{\ominus, w \rightarrow o}}{zF} \quad \text{Equation S2}$$

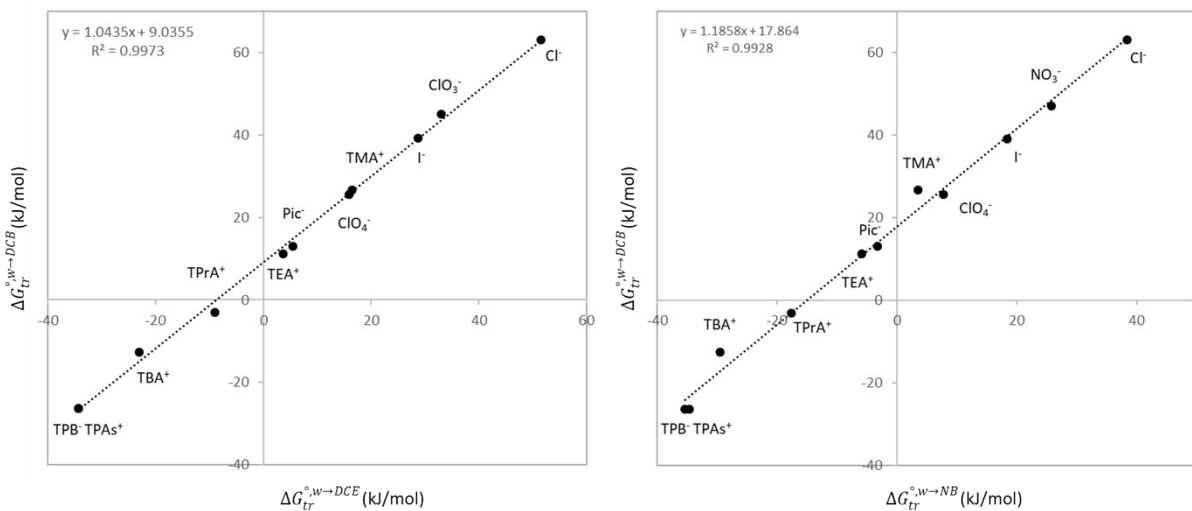

**Figure S5.** Plots of the standard Gibbs energy of ion transfer ( $\Delta G_{tr}^{\ominus, w \rightarrow o}$ ) of various ions showing the linear correlations. Data were collected from several references<sup>2,5,14,6-13</sup> and the average value was plotted.





6. Facilitated phosphate ion transfer by *N,N'*-di(*n*-butyl)thiourea.

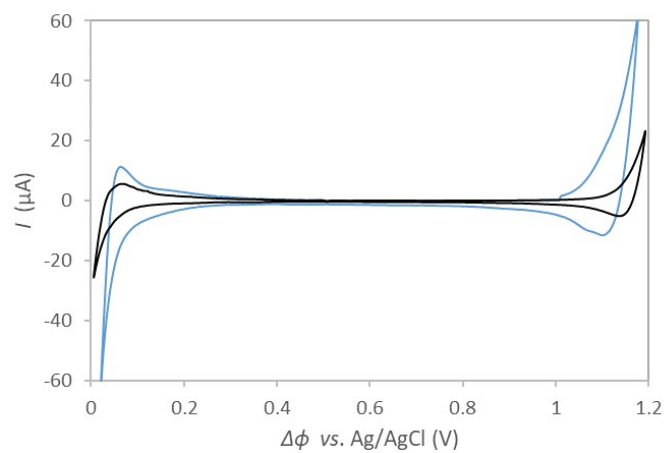

**Figure S6.** CVs of Cell 1 in the presence of only the supporting electrolytes 1M (pH 7) phosphate buffer<sub>(aq)</sub> | 10mM BTPTATFPB<sub>(DCB)</sub> (**black**) and after the addition of 1mM dibutylthiourea<sub>(DCB)</sub> (**blue**). Scan rate = 50 mV/s. It can be seen that after the addition of the receptor, no interfacial reactions took place within the potential window, and only the current limits increased.

## 7. References

- 1 Y. Yang, X. Wu, N. Busschaert, H. Furuta and P. A. Gale, Dissecting the chloride–nitrate anion transport assay, *Chem. Commun.*, 2017, **53**, 9230–9233.
- 2 B. Hundhammer, C. Müller, T. Solomon, H. Alemu and H. Hassen, Ion transfer across the water-o-dichlorobenzene interface, *J. Electroanal. Chem. Interfacial Electrochem.*, 1991, **319**, 125–135.
- 3 T. Solomon, Linear Gibbs energy relationships and the activated transport model for ion transfer across liquid/liquid systems, *J. Electroanal. Chem. Interfacial Electrochem.*, 1991, **313**, 29–35.
- 4 J. Langmaier, S. Zálíš, Z. Samec, V. Bovtun and M. Kempa, Origin of the correlation between the standard Gibbs energies of ion transfer from water to a hydrophobic ionic liquid and to a molecular solvent, *Electrochim. Acta*, 2013, **87**, 591–598.
- 5 M. H. Abraham and A. F. D. de Namor, Solubility of electrolytes in 1,2-dichloroethane and 1,1-dichloroethane, and derived free energies of transfer, *J. Chem. Soc. Faraday Trans. 1 Phys. Chem. Condens. Phases*, 1976, **72**, 955–962.
- 6 J. Czapkiewicz and B. Czapkiewicz-Tutaj, Relative scale of free energy of transfer of anions from water to 1,2-dichloroethane, *J. Chem. Soc. Faraday Trans. 1 Phys. Chem. Condens. Phases*, 1980, **76**, 1663–1668.
- 7 T. Wandlowski, V. Mareček and Z. Samec, Galvani potential scales for water—nitrobenzene and water-1,2-dichloroethane interfaces, *Electrochim. Acta*, 1990, **35**, 1173–1175.
- 8 A. Sabela, V. Mareček, Z. Samec and R. Fuoco, Standard Gibbs energies of transfer of univalent ions from water to 1,2-dichloroethane, *Electrochim. Acta*, 1992, **37**, 231–235.
- 9 Y. Chen, Z. Gao, F. Li, L. Ge, M. Zhang, D. Zhan and Y. Shao, Studies of Electron-Transfer and Charge-Transfer Coupling Processes at a Liquid/Liquid Interface by Double-Barrel Micropipet Technique, *Anal. Chem.*, 2003, **75**, 6593–6601.
- 10 J. Langmaier, A. Trojánek and Z. Samec, Use of the 1,1'-dimethylferrocene oxidation process for the calibration of the reference electrode potential in organic solvents immiscible with water, *J. Electroanal. Chem.*, 2008, **616**, 57–63.
- 11 A. J. Olaya, M. A. Méndez, F. Cortes-Salazar and H. H. Girault, Voltammetric determination of extreme standard Gibbs ion transfer energy, *J. Electroanal. Chem.*, 2010, **644**, 60–66.
- 12 P. Peljo, T. Rauhala, L. Murtomäki, T. Kallio and K. Kontturi, Oxygen reduction at a water-1,2-dichlorobenzene interface catalyzed by cobalt tetraphenyl porphyrine - A fuel cell approach, *Int. J. Hydrogen Energy*, 2011, **36**, 10033–10043.
- 13 P. Vanýsek, Analytical applications of electrified interfaces between two immiscible solutions, *TrAC Trends Anal. Chem.*, 1993, **12**, 363–373.
- 14 T. Osakai and K. Ebina, Non-Bornian Theory of the Gibbs Energy of Ion Transfer between Two Immiscible Liquids, *J. Phys. Chem. B*, 1998, **102**, 5691–5698.
